# Supplementary material for: Exploring the Neurobiology of Nicotine Dependence and Its Implications for Tobacco Use Treatment: A Literature Review Article
Source: Preprints.org preprint supplement (doi:10.20944/preprints202306.2137.v1), 2023-06-29

**Tables and Figures**

| **Table 1. The Surgeon General's Report: Criteria for Drug Dependence** |
| --- |
| **Primary criteria**  Highly controlled or compulsive use  Psychoactive effects  Drug-reinforced behavior  **Additional criteria**  **Addictive behavior often involves**:  Stereotypic patterns of use  Use despite harmful effects  Relapse following abstinence  Recurrent drug cravings  **Dependence-producing drugs often produce:**  Tolerance  Physical dependence  Pleasant (euphoriant) effects |
| **Data from the US Department of Health and Human Services (1988).** |

| **Table 2 Criteria for drug dependence *** |
| --- |
| **A maladaptive pattern of substance use, leading to clinically significant impairment or distress, as manifested by ≥3 of the following criteria occurring at any time in the same 12-month period:**  1. Tolerance, as defined by either of the following:  a. Need for markedly increased amounts of the substance to achieve intoxication or desired effect  b. Markedly diminished effect with continued use of the same amount of the substance  2. Withdrawal, as manifested by either of the following:  a. The characteristic withdrawal syndrome for the substance  b. The same (or closely related) substance is taken to relieve or avoid withdrawal symptoms  3. The substance is often taken in larger amounts or over a longer period than was intended  4. There is a persistent desire or unsuccessful efforts to cut down or control substance use  5. A great deal of time is spent in activities necessary to obtain the substance, use the substance, or recover from its effects  6. Important social, occupational, or recreational activities are given up or reduced because of substance use  7. The substance use is continued despite knowledge of having had a persistent or recurrent physical or psychological problem that is likely to have been caused or exacerbated by the substance |
| *** Criteria from the Diagnostic and Statistical Manual of Mental Disorders-Fourth Edition (DSM-IV).** |


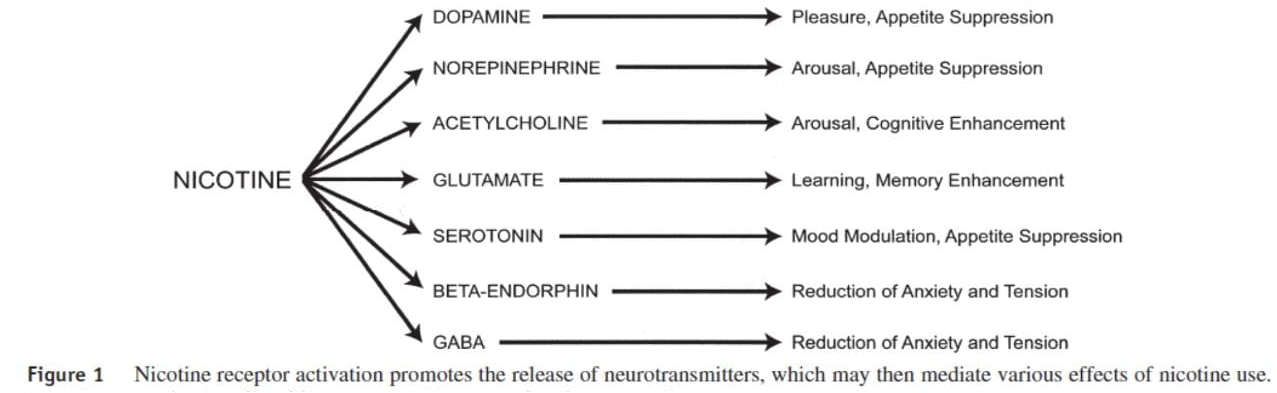

Supplement: Supplementary file 1 [file supplementary]
